# Supplementary material
Source: publisher site journal article supplement (https://www.dovepress.com/get_supplementary_file.php?f=344437.docx)
Supplement: Supplementary file 1 [file get_supplementary_file.php]

**SUPPLIMENTARY DATA**

**Suppl. Table 1: The sensitivity and specificity of clinical performance using VIDAS® SARS‑CoV‑2 IgG and IgM assay on a VIDAS® instrument**

| No. of days after  PCR positive result | Number of samples | Number of VIDAS®  positive results | Positive percent  agreement | 95%  Confidence interval |
| --- | --- | --- | --- | --- |
| Sensitivity | | | | |
| Sensitivity IgG  ≥ 15 days | 40 | 39 | 97.5% | 88.4-99.8 |
| Sensitivity IgM  ≥ 15 days | 40 | 38 | 95.0% | 87.5-99.1 |
| Specificity | | | | |
| Specificity IgG  ≥ 15 days | 40 | 40 | 100.0% | 98.9-100 |
| Specificity IgM  ≥ 15 days | 40 | 39 | 95.5% | 97.0-99.6 |

**Suppl. Table 2: Positive and negative predictive values to the disease in the population.**

| Number of Days Post  Symptoms Onset | PPV | NPV |
| --- | --- | --- |
| IgG, ≥ 7 days  (95% CI) | 93.0%  (65.6-98.7) | 99.4%  (98.9-99.8) |
| IgM, ≥ 7 days  (95% CI) | 92.5%  (65.2-98.9) | 99.5%  (99.0-99.7) |

*PPV denotes a Positive Predictive Value, Negative Predictive Value, Confidence interval. The calculation was done with the assumption of 5% prevalence.
